# Supplementary material
Source: PubMed Central journal article supplement (PMC4944691)
Supplement: SD4.pdf [file SD4.pdf]

SUPPLEMENTAL TABLE 1

Seroprevalence for EEEV, WNV, SLEV, and TURV with 95% CL of wild birds by state tested by plaque reduction neutralization test

| State (no. of samples tested) | EEEV % (95% CL) | WNV % (95% CL)   | SLEV % (95% CL)  | TURV % (95% CL)  | Species tested by state                                                                                                                                                  |
|-------------------------------|-----------------|------------------|------------------|------------------|--------------------------------------------------------------------------------------------------------------------------------------------------------------------------|
| Alabama (22)                  | 0 (0–14.9)      | 13.6 (4.8–33.3)  | 9.1 (2.5–27.8)   | 0 (0–14.9)       | American crow, Canada goose, double-crested cormorant                                                                                                                    |
| Alaska (8)                    | 0 (0–32.4)      | 25.0 (7.2–59.1)  | 87.5 (52.9–97.8) | 0 (0–32.4)       | American green-winged teal, Canada goose, lesser snow goose, mallard, sandhill crane                                                                                     |
| Arizona (9)                   | 0 (0–29.9)      | 11.1 (2.0–43.5)  | 0 (0–29.9)       | 0 (0–29.9)       | American coot, American wigeon, mallard                                                                                                                                  |
| Arkansas (58)                 | 3.5 (1.0–11.7)  | 3.5 (1.0–11.7)   | 1.7 (0.3–9.1)    | 3.5 (1.0–11.7)   | Canada goose, wood duck                                                                                                                                                  |
| California (11)               | 18.2 (5.1–47.7) | 27.3 (9.8–56.6)  | 9.1 (1.6–37.7)   | 0 (0–25.9)       | Canada goose, mallard                                                                                                                                                    |
| Colorado (10)                 | 0 (0–27.8)      | 20.0 (5.7–51.0)  | 30.0 (10.8–60.3) | 0 (0–27.8)       | American kestrel, Canada goose, Eurasian collared-dove, lark bunting, northern shrike, western meadowlark                                                                |
| Connecticut (8)               | 0 (0–32.4)      | 0 (0–32.4)       | 25.0 (7.2–59.1)  | 0 (0–32.4)       | European starling                                                                                                                                                        |
| Florida (30)                  | 6.7 (1.9–21.3)  | 26.7 (14.2–44.5) | 6.7 (1.9–21.3)   | 0 (0–11.4)       | Black-necked stilt, double-crested cormorant, eastern meadowlark, herring gull, hooded merganser, laughing gull, mourning dove, white ibis, wood duck                    |
| Georgia (33)                  | 0 (0–10.4)      | 6.1 (1.7–19.6)   | 6.1 (1.7–19.6)   | 0 (0–10.4)       | Canada goose, mallard, Muscovy duck, rock pigeon                                                                                                                         |
| Hawaii (10)                   | 0 (0–27.8)      | 0 (0–27.8)       | 20.0 (5.7–51.0)  | 0 (0–27.8)       | Common myna, spotted dove, zebra dove                                                                                                                                    |
| Idaho (18)                    | 5.6 (1.0–25.8)  | 11.1 (3.1–32.8)  | 16.7 (5.8–39.2)  | 5.6 (1.0–25.8)   | Mallard                                                                                                                                                                  |
| Illinois (29)                 | 0 (0–11.7)      | 3.5 (0.6–17.2)   | 55.2 (37.6–71.6) | 3.5 (0.6–17.2)   | Canada goose, European starling, great blue heron, mallard, rock pigeon, red-tailed hawk                                                                                 |
| Indiana (5)                   | 0 (0–43.5)      | 20.0 (3.6–62.5)  | 20.0 (3.6–62.5)  | 0 (0–43.5)       | Mute swan                                                                                                                                                                |
| Iowa (23)                     | 0 (0–14.3)      | 52.2 (33.0–70.8) | 78.3 (58.1–90.3) | 0 (0–14.3)       | Rock pigeon                                                                                                                                                              |
| Kansas (21)                   | 0 (0–15.5)      | 19.1 (7.7–40.0)  | 47.6 (28.3–67.6) | 4.8 (0.9–22.7)   | American green-winged teal, blue-winged teal, Canada goose, mallard, rock pigeon                                                                                         |
| Kentucky (27)                 | 7.4 (2.1–23.4)  | 22.2 (10.6–40.8) | 14.8 (5.9–32.5)  | 14.8 (5.9–32.5)  | American coot, Canada geese                                                                                                                                              |
| Louisiana (41)                | 0 (0–8.6)       | 34.2 (21.6–49.5) | 22.0 (12.0–36.7) | 12.2 (5.3–25.5)  | American crow, American golden-plover, double-crested cormorant, great blue heron, great egret, laughing gull, mourning dove, ring-billed gull, rock pigeon, white ibis  |
| Maine (6)                     | 0 (0–39.0)      | 16.7 (3.0–56.4)  | 33.3 (9.7–70.0)  | 0 (0–39.0)       | Canada goose, double-crested cormorant, laughing gull, ring-billed gull                                                                                                  |
| Maryland (10)                 | 0 (0–27.8)      | 10.0 (1.8–40.4)  | 30.0 (10.8–60.3) | 0 (0–27.8)       | Double-crested cormorant, rock pigeon                                                                                                                                    |
| Massachusetts (15)            | 0 (0–20.4)      | 6.7 (1.2–29.8)   | 6.7 (1.2–29.8)   | 0 (0–20.4)       | Canada geese, European starling                                                                                                                                          |
| Michigan (52)                 | 1.9 (0.3–10.1)  | 11.5 (5.4–23.0)  | 17.3 (9.4–29.7)  | 7.7 (3.0–18.2)   | Mute swan, rock pigeon                                                                                                                                                   |
| Minnesota (29)                | 3.5 (0.6–17.2)  | 48.3 (31.4–65.6) | 17.2 (7.6–34.6)  | 6.9 (1.9–22.0)   | American crow, Canada goose, double-crested cormorant, great blue heron, mallard, ring-billed gull, rock pigeon, red-tailed hawk, sandhill crane, wild turkey, wood duck |
| Mississippi (43)              | 2.3 (0.4–12.1)  | 23.3 (13.2–37.7) | 4.7 (1.3–15.5)   | 4.7 (1.3–15.5)   | Canada goose, double-crested cormorant                                                                                                                                   |
| Missouri (17)                 | 0 (0–18.4)      | 0 (0–18.4)       | 23.5 (9.6–47.3)  | 0 (0–18.4)       | Rock pigeon                                                                                                                                                              |
| Montana (9)                   | 0 (0–29.9)      | 22.2 (6.3–54.7)  | 11.1 (2.0–43.5)  | 0 (0–29.9)       | Canada goose, gray partridge, mourning dove, rock pigeon, Turkey vulture                                                                                                 |
| New Hampshire (16)            | 0 (0–19.4)      | 18.8 (6.6–43.0)  | 18.8 (6.6–43.0)  | 0 (0–19.4)       | Canada goose, great black-backed gull, herring gull, mute swan, ring-billed gull, rock pigeon                                                                            |
| New Jersey (66)               | 3.0 (0.8–10.4)  | 37.9 (27.2–49.9) | 37.9 (27.2–49.9) | 3.0 (0.8–10.4)   | American black duck, Canada goose, laughing gull, mallard, mute swan, ring-billed gull, red-tailed hawk                                                                  |
| New Mexico (19)               | 0 (0–16.8)      | 31.6 (15.4–54.0) | 26.3 (11.8–48.8) | 0 (0–16.8)       | Great-tailed grackle, rock pigeon                                                                                                                                        |
| New York (14)                 | 0 (0–21.5)      | 21.4 (7.6–47.6)  | 7.1 (1.3–31.5)   | 0 (0–21.5)       | Canada goose, European starling, fish crow, herring gull, ring-billed gull, rock pigeon                                                                                  |
| North Carolina (26)           | 0 (0–12.9)      | 7.7 (2.1–24.1)   | 23.1 (11.0–42.1) | 0 (0–12.9)       | Canada goose, great black-backed gull, herring gull                                                                                                                      |
| North Dakota (17)             | 0 (0–18.4)      | 29.4 (13.3–53.1) | 29.4 (13.3–53.1) | 29.4 (13.3–53.1) | California gull, double-crested cormorant                                                                                                                                |
| Ohio (35)                     | 0 (0–9.9)       | 37.1 (23.2–53.7) | 20.0 (10.0–35.9) | 2.9 (0.5–14.5)   | brown-headed cowbird, Canada goose, Double-crested cormorant, European starling, great blue heron, mallard, mourning dove, rock pigeon, Wild turkey                      |
| Oklahoma (12)                 | 0 (0–24.3)      | 0 (0–24.3)       | 16.7 (4.7–44.8)  | 0 (0–24.3)       | Mourning dove, rock pigeon                                                                                                                                               |
| Oregon (5)                    | 0 (0–43.5)      | 20.0 (3.6–62.5)  | 20.0 (3.6–62.5)  | 0 (0–43.5)       | American green-winged teal, northern pintail, northern shoveler                                                                                                          |
| Pennsylvania (79)             | 1.3 (0.2–6.8)   | 11.4 (6.1–20.3)  | 12.7 (7.0–21.8)  | 0 (0–4.6)        | Canada goose, double-crested cormorant, great black-backed gull, mute swan, ring-billed gull, rock pigeon, Turkey vulture                                                |

(continued)

SUPPLEMENTAL TABLE 1

Continued

| State (no. of samples tested) | EEEV % (95% CL) | WNV % (95% CL)   | SLEV % (95% CL)  | TURV % (95% CL) | Species tested by state                                                                                                                                |
|-------------------------------|-----------------|------------------|------------------|-----------------|--------------------------------------------------------------------------------------------------------------------------------------------------------|
| Rhode Island (28)             | 10.7 (3.7–27.2) | 25.0 (12.7–43.4) | 14.3 (5.7–31.5)  | 0 (0–12.1)      | Herring gull, mourning dove, mute swan                                                                                                                 |
| Tennessee (33)                | 0 (0–10.4)      | 3.0 (0.5–15.3)   | 3.0 (0.5–15.3)   | 0 (0–10.4)      | Black vulture, Canada geese                                                                                                                            |
| Utah (30)                     | 3.3 (0.6–16.7)  | 26.7 (14.2–44.5) | 10.0 (3.5–25.6)  | 3.3 (0.6–16.7)  | Black-billed magpie, Canada goose,<br>California gull, common raven,<br>double-crested cormorant,<br>lesser scaup, mallard, ruddy duck,<br>tundra swan |
| Virginia (8)                  | 0 (0–32.4)      | 0 (0–32.4)       | 50.0 (21.5–78.5) | 12.5 (2.2–47.1) | Canada goose, double-crested cormorant,<br>rock pigeon                                                                                                 |
| Vermont (14)                  | 7.1 (1.3–31.5)  | 35.7 (16.3–61.2) | 42.9 (21.4–67.4) | 7.1 (1.3–31.5)  | Double-crested cormorant, ring-billed gull                                                                                                             |
| Washington (5)                | 0 (0–43.5)      | 60.0 (23.1–88.2) | 20.0 (3.6–62.5)  | 0 (0–43.5)      | American crow, great blue heron, mallard,<br>rock pigeon, red-tailed hawk                                                                              |
| West Virginia (12)            | 0 (0–24.3)      | 8.3 (1.5–35.4)   | 0 (0–24.3)       | 0 (0–24.3)      | Canada goose                                                                                                                                           |
| Wisconsin (27)                | 0 (0–12.5)      | 14.8 (5.9–32.5)  | 14.8 (5.9–32.5)  | 3.7 (0.7–18.3)  | Canada goose, mute swan                                                                                                                                |
| Wyoming (7)                   | 0 (0–35.4)      | 14.3 (2.6–51.3)  | 42.9 (15.8–75.0) | 0 (0–35.4)      | Rock pigeon                                                                                                                                            |

CL = confidence limits; EEEV = eastern equine encephalitis virus; SLEV = St. Louis encephalitis virus; TURV = Turlock virus; WNV = West Nile virus.
